# Supplementary material for: Relationship between ion currents and membrane capacitance in canine ventricular myocytes
Source: Research Square preprint supplement (doi:10.21203/rs.3.rs-3975222/v1), 2024-03-07

# **Relationship between ion currents and membrane capacitance in canine ventricular myocytes**

## **Supplementary Material**

### **Methods**

In this study, we retrospectively analyzed the relationship between  $C_m$  and the major cardiac ion currents based on cellular electrophysiology data obtained by our research group within the last 15 years. Therefore, no further animals were sacrificed for data analyses described in this article.

### **Animals**

Adult mongrel dogs of either sex were anesthetized with intramuscular injections of ketamine hydrochloride (10 mg/kg; Calypsol, Richter Gedeon, Hungary) and xylazine hydrochloride (1 mg/kg; Sedaxylan, Eurovet Animal Health BV, The Netherlands) according to a protocol approved by the local Animal Care Committee (license N<sup>o</sup>: 2/2020/DEMÁB, 9/2015/DEMÁB). The age range of the animals were 11-26 months, and they weighed 8-17 kg. All animal procedures conformed to the guidelines from Directive 2010/63/EU of the European Parliament on the protection of animals used for scientific purposes. Bilateral palpebral reflex, jaw tone and response to bilateral painful stimuli (toe pinch) were assessed in every two minutes to monitor the depth of anesthesia. The surgical procedure started after the palpebral reflex and the withdrawal response to painful stimuli had been absent on both sides, there had been no immediate respiratory response to painful stimuli and there had been a considerable drop in the jaw tone for at least six minutes (three consecutive assessments).

### **Isolation of cardiomyocytes**

Single canine myocytes were obtained by enzymatic dispersion using the segment perfusion technique, as previously described [1, 2]. A wedge-shaped section of the ventricular wall (supplied typically by the left anterior descending coronary artery) was cannulated, dissected and perfused with a nominally  $Ca^{2+}$ -free Joklik solution (Minimum Essential Medium Eagle, Joklik Modification) for 5 min. This was followed by a 30 min perfusion with Joklik solution supplemented with 1 mg/ml collagenase (Type II, Worthington Biochemical Co., Lakewood, NJ, USA; representing final activity of 224 U/ml) and 0.2% bovine serum albumin (Fraction V., Sigma) containing 50  $\mu$ M  $Ca^{2+}$ . Finally, the tissue was minced, the cells were released and

the normal external  $\text{Ca}^{2+}$  concentration was gradually restored. The cells were stored in Minimum Essential Medium Eagle at 15 °C until use. This procedure yielded dominantly midmyocardial cells for electrophysiological measurements. In some experiments designed for studying  $I_{\text{to1}}$  under CVC conditions a dermatome (C.R. Bard Inc. Covington, USA) was used to peel off very thin (0.5 mm) subepicardial and subendocardial strips from the left ventricular wall. Similar samples were also dissected from the central layer of midmyocardium (typically 3 mm underneath the epicardium) [3].

## **Chemicals**

All chemicals were purchased from Sigma-Aldrich (St. Louis, MO, USA), except for GS-458967 (MedKoo Biosciences, Morrisville, NC, USA) and HMR-1556 (Tocris Bioscience, Bristol, UK). ORM-10962 was a kind gift from Prof. András Varró (University of Szeged, Szeged, Hungary).

## **Electrophysiology – conventional voltage-clamp**

### **L-type $\text{Ca}^{2+}$ current ( $I_{\text{Ca,L}}$ )**

$I_{\text{Ca,L}}$  was studied under CVC conditions in 198 myocytes. The cells were bathed with Tyrode solution containing 3 mM 4-aminopyridine, 1  $\mu\text{M}$  E-4031 and 1  $\mu\text{M}$  HMR-1556 to block  $I_{\text{to1}}$ ,  $I_{\text{Kr}}$  and  $I_{\text{Ks}}$ , respectively. In some experiments  $I_{\text{to1}}$  and  $I_{\text{Ks}}$  were suppressed by 30  $\mu\text{M}$  chromanol-293B. The pipette solution contained (in mM): KCl, 110; KOH, 40; HEPES, 10; EGTA 10; TEACl, 20; K-ATP, 3. The membrane potential was held at  $-80$  mV between the pulses applied at a frequency of 0.5 Hz. The test potential lasting for 400 ms at  $+5$  mV was preceded by a short prepulse of 50 ms duration clamped to  $-40$  mV in order to inactivate  $\text{Na}^+$  currents. The initial 70 ms of a representative  $I_{\text{Ca,L}}$  record is presented in **Fig. 1.A**.

### **Inward rectifier $\text{K}^+$ current ( $I_{\text{K1}}$ )**

Under CVC conditions  $I_{\text{K1}}$  was recorded at the end of a hyperpolarizing pulse to  $-130$  mV, lasting for 400 ms and applied from a holding potential of  $-80$  mV at a rate of 0.2 Hz (**Fig. 3.A**).  $I_{\text{Ca,L}}$  was blocked by 1  $\mu\text{M}$  nisoldipine added to the bathing medium. The pipette solution contained (in mM): K-aspartate, 100; KCl, 45;  $\text{MgCl}_2$ , 1; HEPES, 5; EGTA, 10; K-ATP, 3. This pipette solution was used when measuring  $I_{\text{Kr}}$  and  $I_{\text{Ks}}$  tail currents as well as  $I_{\text{to1}}$  current amplitudes.

### **Rapid delayed rectifier $\text{K}^+$ current ( $I_{\text{Kr}}$ )**

Under CVC conditions  $I_{Kr}$  was activated by a pulse to +40 mV lasting for 200 ms, then the membrane was repolarized to -40 mV to record the  $I_{Kr}$  tail current (**Fig. 4.A**). The holding potential was also -40 mV in these experiments. The pulse protocol was repeated at a rate of 0.05 Hz. For the blockade of  $I_{Ca,L}$  1  $\mu$ M nisoldipine was added to the bathing medium, while  $I_{Ks}$  was suppressed by 1  $\mu$ M HMR-1556.

### **Slow delayed rectifier $K^+$ current ( $I_{Ks}$ )**

Under CVC conditions  $I_{Ks}$  was activated with a 3 s long voltage pulse to +50 mV, arising from the holding potential of -40 mV. Then the membrane was repolarized to -40 mV, to record  $I_{Ks}$  current tails (**Fig. 5.A**). The pulse protocol was repeated at a frequency of 0.1 Hz. In these experiments  $I_{Ca,L}$  and  $I_{Kr}$  were inhibited with 1  $\mu$ M nisoldipine and 1  $\mu$ M E-4031, respectively.

### **Transient outward $K^+$ current ( $I_{to1}$ )**

In the investigated 108 myocytes, the current was activated by a 400-ms-long depolarizing step to +60 mV, preceded by a short (10 ms) depolarization to -40 mV to inactivate sodium channels. This pulse protocol, applied at a rate of 0.2 Hz, arose from the holding potential of -80 mV. The bathing medium contained 1  $\mu$ M nisoldipine to block  $I_{Ca,L}$ .

### **Statistical testing – correlation analysis**

There are several assumptions that *Pearson's correlation* analysis imposes, one of which is that the continuous variable pairs should follow a bivariate normal distribution. When this assumption is not met, there is disagreement in the statistical literature about whether *Pearson's correlation* is “robust” enough to violations of normality (that is, whether *Pearson's correlation* is still able to provide a valid result even though the data pairs do not follow the bivariate normal distribution). Questioning the “robustness” of *Pearson's correlation* under conditions that violate bivariate normality are based on whether further assumptions and mathematical measures of robustness are met, and whether these additional assumptions are true in everyday practice.

Authors of this paper do not feel themselves mathematically qualified to argue for or against either side. Instead, we report if there is a significant violation of bivariate normal distribution of the parameter pair in question. If the data pairs do not violate the bivariate normal distribution, we report the *Pearson's correlation coefficient* ( $r$ ) in the text. In cases of significantly non-normal bivariate distribution, we took a conservative approach, and report

the *Spearman's correlation coefficient* ( $\rho$ , “rho”). However, for a comprehensive overview of correlation analysis, both *Pearson's* and *Spearman's* correlations are shown for all  $C_m$  and current parameter data pairs in **Supplementary Tables 4., 5. and 6.**

For further reading on this issue, we refer to statistics handbooks, and the papers of Knief and Forstmeier [4], Edgell and Noon [5] and Havlicek and Peterson [6].

## Results

Distributions of the investigated ion current parameters are reported in the form of bar graphs on **Supplementary Figures 1-6**. Also, summary of descriptive statistics of the ion current parameters are given in **Supplementary Tables 1-3**.

As mentioned previously, a comprehensive overview of correlation analysis with both *Pearson's* and *Spearman's* correlations are shown for all  $C_m$  and current parameter data pairs in **Supplementary Tables 4., 5. and 6.**

**Supplementary Table 1.** Summary of descriptive statistics of  $I_{Ca,L}$ ,  $I_{Kr}$ ,  $I_{Ks}$  and  $I_{K1}$  under conventional voltage-clamp conditions. Parameter distributions are visualized on **Supplemental Figure 2** as bar graphs.

| Current    | Parameter           | Significantly non-normal distribution? | CV    | Dividing with $C_m$ significantly reduced CV? |
|------------|---------------------|----------------------------------------|-------|-----------------------------------------------|
| $I_{Ca,L}$ | $C_m$               | No                                     | 0.227 |                                               |
|            | peak $I_{Ca,L}$     | Yes ( $p=0.002$ , $\phi=0.217$ )       | 0.359 |                                               |
|            | peak $I_{Ca,L}/C_m$ | Yes ( $p=0.006$ , $\phi=0.183$ )       | 0.296 | Yes ( $p=0.015$ )                             |
| $I_{Kr}$   | $C_m$               | No                                     | 0.307 |                                               |
|            | peak $I_{Kr}$       | Yes ( $p<0.001$ , $\phi=0.379$ )       | 0.458 |                                               |
|            | peak $I_{Kr}/C_m$   | Yes ( $p=0.013$ , $\phi=0.221$ )       | 0.378 | No ( $p=0.075$ )                              |
| $I_{Ks}$   | $C_m$               | Yes ( $p=0.013$ , $\phi=0.33$ )        | 0.261 |                                               |
|            | peak $I_{Ks}$       | Yes ( $p<0.001$ , $\phi=0.592$ )       | 0.658 |                                               |
|            | peak $I_{Ks}/C_m$   | Yes ( $p<0.001$ , $\phi=0.359$ )       | 0.583 | No                                            |
| $I_{K1}$   | $C_m$               | No                                     | 0.238 |                                               |
|            | peak $I_{K1}$       | No                                     | 0.309 |                                               |
|            | peak $I_{K1}/C_m$   | No                                     | 0.246 | Yes ( $p=0.0495$ )                            |

**Supplementary Table 2.** Summary of descriptive statistics of  $I_{to1}$  under conventional voltage-clamp conditions. Parameter distributions are visualized on **Supplemental Figure 3** as bar graphs.

| Region                   | Parameter          | Significantly non-normal distribution? | CV    | Dividing with $C_m$ significantly reduced CV? |
|--------------------------|--------------------|----------------------------------------|-------|-----------------------------------------------|
| all cells                | $C_m$              | Yes ( $p=0.036$ , $\phi=0.248$ )       | 0.268 |                                               |
|                          | peak $I_{to1}$     | Yes ( $p<0.001$ , $\phi=0.334$ )       | 0.536 |                                               |
|                          | peak $I_{to1}/C_m$ | Yes ( $p<0.001$ , $\phi=0.307$ )       | 0.526 | No                                            |
| EPI                      | $C_m$              | No                                     | 0.229 |                                               |
|                          | peak $I_{to1}$     | No                                     | 0.323 |                                               |
|                          | peak $I_{to1}/C_m$ | Yes ( $p=0.008$ , $\phi=0.775$ )       | 0.194 | Yes ( $p=0.012$ )                             |
| ENDO                     | $C_m$              | No                                     | 0.247 |                                               |
|                          | peak $I_{to1}$     | No                                     | 0.371 |                                               |
|                          | peak $I_{to1}/C_m$ | No                                     | 0.28  | No                                            |
| MID                      | $C_m$              | No                                     | 0.247 |                                               |
|                          | peak $I_{to1}$     | No                                     | 0.377 |                                               |
|                          | peak $I_{to1}/C_m$ | No                                     | 0.226 | No ( $p=0.059$ )                              |
| <i>presumably</i><br>MID | $C_m$              | No                                     | 0.265 |                                               |
|                          | peak $I_{to1}$     | No                                     | 0.386 |                                               |
|                          | peak $I_{to1}/C_m$ | No                                     | 0.266 | Yes ( $p=0.009$ )                             |

**Supplementary Table 3.** Summary of descriptive statistics the currents under action potential voltage-clamp conditions. Parameter distributions are visualized on **Supplemental Figure 4 and 5** as bar graphs.

| Current       | Parameter                     | Significantly non-normal distribution? | CV    | Dividing with $C_m$ significantly reduced CV? |
|---------------|-------------------------------|----------------------------------------|-------|-----------------------------------------------|
| $I_{Ca,L}$    | $C_m$                         | No                                     | 0.305 |                                               |
|               | peak $I_{Ca,L}$               | No                                     | 0.336 |                                               |
|               | peak $I_{Ca,L}/C_m$           | No                                     | 0.27  | No                                            |
|               | mid-plateau $I_{Ca,L}$        | No                                     | 0.342 |                                               |
|               | mid-plateau $I_{Ca,L}/C_m$    | No                                     | 0.274 | No                                            |
|               | $Q_{Ca,L}$                    | No                                     | 0.413 |                                               |
|               | $Q_{Ca,L}/C_m$                | No                                     | 0.284 | No                                            |
| $I_{Na,late}$ | $C_m$                         | No                                     | 0.241 |                                               |
|               | mid-plateau $I_{Na,late}$     | Yes ( $p=0.029$ , $\phi=0.364$ )       | 0.493 |                                               |
|               | mid-plateau $I_{Na,late}/C_m$ | No                                     | 0.415 | No                                            |
|               | $Q_{Na,late}$                 | Yes ( $p=0.037$ , $\phi=0.392$ )       | 0.447 |                                               |
|               | $Q_{Na,late}/C_m$             | No                                     | 0.373 | No                                            |
| $I_{NCX}$     | $C$                           | No                                     | 0.245 |                                               |
|               | mid-plateau $I_{NCX}$         | No                                     | 0.403 |                                               |
|               | mid-plateau $I_{NCX}/C_m$     | No                                     | 0.348 | No                                            |
|               | $Q_{NCX}$                     | Yes ( $p=0.024$ , $\phi=0.613$ )       | 0.331 |                                               |
|               | $Q_{NCX}/C_m$                 | No                                     | 0.227 | No                                            |
| $I_{Kr}$      | $C$                           | No                                     | 0.247 |                                               |
|               | peak $I_{Kr}$                 | No                                     | 0.359 |                                               |
|               | peak $I_{Kr}/C_m$             | No                                     | 0.266 | No                                            |
|               | mid-plateau $I_{Kr}$          | No                                     | 0.632 |                                               |
|               | mid-plateau $I_{Kr}/C_m$      | No                                     | 0.58  | No                                            |
|               | $Q_{Kr}$                      | No                                     | 0.397 |                                               |
|               | $Q_{Kr}/C_m$                  | No                                     | 0.289 | No                                            |
| $I_{Ks}$      | $C_m$                         | No                                     | 0.276 |                                               |
|               | peak $I_{Ks}$                 | No                                     | 0.403 |                                               |
|               | peak $I_{Ks}/C_m$             | No                                     | 0.354 | No                                            |
|               | mid-plateau $I_{Ks}$          | No                                     | 0.561 |                                               |
|               | mid-plateau $I_{Ks}/C_m$      | No                                     | 0.568 | No                                            |
|               | $Q_{Ks}$                      | No                                     | 0.321 |                                               |
|               | $Q_{Ks}/C_m$                  | No                                     | 0.245 | No                                            |
| $I_{K1}$      | $C_m$                         | No                                     | 0.255 |                                               |
|               | peak $I_{K1}$                 | No                                     | 0.27  |                                               |
|               | peak $I_{K1}/C_m$             | No                                     | 0.162 | Yes ( $p=0.044$ )                             |
|               | mid-plateau $I_{K1}$          | Yes ( $p<0.001$ , $\phi=0.738$ )       | 0.564 |                                               |
|               | mid-plateau $I_{K1}/C_m$      | Yes ( $p=0.016$ , $\phi=0.442$ )       | 0.501 | No                                            |
|               | $Q_{K1}$                      | No                                     | 0.276 |                                               |
|               | $Q_{K1}/C_m$                  | No                                     | 0.162 | Yes ( $p=0.036$ )                             |

**Supplementary Table 4.** Correlations between membrane capacitance and  $I_{Ca,L}$ ,  $I_{Kr}$ ,  $I_{Ks}$  and  $I_{K1}$  peak currents under conventional voltage-clamp conditions

| Parameter       | Pearson |        | Spearman |        | Significantly non-normal bivariate distribution? |
|-----------------|---------|--------|----------|--------|--------------------------------------------------|
|                 | r       | p      | $\rho$   | p      |                                                  |
| peak $I_{Ca,L}$ | -0.605  | <0.001 | -0.603   | <0.001 | Yes (p=0.001)                                    |
| peak $I_{Kr}$   | 0.654   | <0.001 | 0.628    | <0.001 | Yes (p=0.001)                                    |
| peak $I_{Ks}$   | 0.396   | <0.001 | 0.223    | 0.048  | Yes (p<0.001)                                    |
| peak $I_{K1}$   | -0.721  | <0.001 | -0.677   | <0.001 | No                                               |

**Supplementary Table 5.** Correlations between membrane capacitance and  $I_{to1}$  peak under conventional voltage-clamp conditions

| Region                | Pearson |        | Spearman |        | Significantly non-normal bivariate distribution? |
|-----------------------|---------|--------|----------|--------|--------------------------------------------------|
|                       | r       | p      | $\rho$   | p      |                                                  |
| all cells             | 0.221   | 0.022  | 0.253    | 0.008  | Yes (p<0.001)                                    |
| EPI                   | 0.867   | <0.001 | 0.829    | <0.001 | Yes (p<0.01)                                     |
| ENDO                  | 0.711   | 0.003  | 0.64     | 0.01   | No                                               |
| MID                   | 0.825   | <0.001 | 0.807    | <0.001 | No                                               |
| <i>presumably</i> MID | 0.703   | <0.001 | 0.717    | <0.001 | Yes (p=0.003)                                    |

**Supplementary Table 6.** Correlations between membrane capacitance and current parameters under action potential voltage-clamp conditions

| Parameter                 | Pearson |        | Spearman |        | Significantly non-normal bivariate distribution? |
|---------------------------|---------|--------|----------|--------|--------------------------------------------------|
|                           | r       | p      | $\rho$   | p      |                                                  |
| peak $I_{Ca,L}$           | -0.736  | 0.002  | -0.771   | 0.001  | No                                               |
| mid-plateau $I_{Ca,L}$    | -0.774  | <0.001 | -0.689   | 0.006  | No                                               |
| $Q_{Ca,L}$                | -0.77   | <0.001 | -0.664   | 0.009  | No                                               |
| mid-plateau $I_{Na,late}$ | -0.132  | 0.54   | -0.28    | 0.185  | Yes (p=0.003)                                    |
| $Q_{Na,late}$             | -0.475  | 0.019  | -0.424   | 0.039  | No                                               |
| mid-plateau $I_{NCX}$     | -0.151  | 0.563  | -0.145   | 0.579  | Yes (p=0.046)                                    |
| $Q_{NCX}$                 | -0.607  | 0.01   | -0.559   | 0.022  | No                                               |
| peak $I_{Kr}$             | 0.704   | <0.001 | 0.644    | 0.004  | No                                               |
| mid-plateau $I_{Kr}$      | 0.312   | 0.194  | 0.188    | 0.44   | No (p=0.057)                                     |
| $Q_{Kr}$                  | 0.709   | <0.001 | 0.702    | 0.001  | No                                               |
| peak $I_{Ks}$             | 0.53    | 0.024  | 0.521    | 0.028  | No                                               |
| mid-plateau $I_{Ks}$      | 0.436   | 0.071  | 0.488    | 0.042  | No                                               |
| $Q_{Ks}$                  | 0.59    | 0.01   | 0.55     | 0.02   | No                                               |
| peak $I_{K1}$             | 0.785   | <0.001 | 0.774    | <0.001 | No                                               |
| mid-plateau $I_{K1}$      | 0.265   | 0.274  | 0.218    | 0.369  | Yes (p<0.001)                                    |
| $Q_{K1}$                  | 0.767   | <0.001 | 0.781    | <0.001 | No                                               |

## Supplementary Figure legends

**Suppl. Fig. 1.** Distribution of pooled cell membrane capacitance (C) values of all cells involved in the present study (n=639). Capacitance values were grouped into 10-pF bins to show the distribution as a bar graph. The distribution significantly deviated from normal distribution ( $p < 0.001$ ), being right-skewed (skewness=0.533) and leptokurtic (excess kurtosis=0.561). The arithmetic mean of  $C_m$  was  $139.87 \pm 1.45$  pF, and median value was 139 pF. The observed effect size of the deviation from normal distribution was “small” ( $\phi = 0.228$ ).

**Suppl. Fig. 2.** Distribution of cell membrane capacitances (C; left panels), peak current amplitudes ( $I_{peak}$ ; middle panels), and peak current densities ( $J_{peak}$ ; right panels) in conventional voltage clamp experiments of  $I_{Ca,L}$  (A, B, C),  $I_{K1}$  (D, E, F),  $I_{Kr}$  (G, H, I) and  $I_{Ks}$  (J, K, L).

**Suppl. Fig. 3.** Distribution of cell membrane capacitances (C; left panels), peak current amplitudes ( $I_{peak}$ ; middle panels), and peak current densities ( $J_{peak}$ ; right panels) in conventional voltage clamp experiments of  $I_{to1}$ . Distributions are shown for all the cells involved in the study (A, B, C), for cells of documented subepicardial origin (EPI; D, E, F), for cells of documented subendocardial origin (ENDO; G, H, I), for cells of documented midmyocardial origin (MID; J, K, L) and for the *presumably* MID cells (that is, all cells except for the documented EPI and ENDO cells; M, N, O).

**Suppl. Fig. 4.** Distribution of cell membrane capacitances (A, F) and ion current parameters (B-E, G-J) for experiments with the late sodium current ( $I_{Na,late}$ , upper panels) and the sodium-calcium exchange current ( $I_{NCX}$ , lower panels), respectively, under action potential voltage clamp conditions. A, F: cell membrane capacitances (C) for experiments with  $I_{Na,late}$  and  $I_{NCX}$ ; B, G: mid-plateau ion current magnitudes ( $I_{P50\%}$ ); C, H: current integrals (Q); D, I: mid-plateau ion current densities ( $J_{P50\%}$ ); E, J: current integrals divided with membrane capacitance (Q/C).

**Suppl. Fig. 5.** Distribution of cell membrane capacitances (A, H) and ion current parameters (B-G, I-N) for experiments with the L-type calcium current ( $I_{Ca,L}$ , upper panels) and the inward rectifying potassium current ( $I_{K1}$ , lower panels), respectively, under action potential voltage clamp conditions. A, H: cell membrane capacitances (C) for experiments with  $I_{Ca,L}$  and  $I_{K1}$ ; B, I: peak ion current amplitudes ( $I_{peak}$ ); C, J: mid-plateau ion current magnitudes ( $I_{P50\%}$ ); D, K: current integrals (Q); E, L: peak ion current densities ( $J_{peak}$ ); F, M: mid-plateau ion current densities ( $J_{P50\%}$ ); G, N: current integrals divided with membrane capacitance (Q/C).

**Suppl. Fig. 6.** Distribution of cell membrane capacitances (A, H) and ion current parameters (B-G, I-N) for experiments with the rapid ( $I_{Kr}$ , upper panels) and the slow ( $I_{Ks}$ , lower panels) delayed rectifier potassium currents, respectively, under action potential voltage clamp conditions. A, H: cell membrane capacitances (C) for experiments with  $I_{Ca,L}$  and  $I_{K1}$ ; B, I: peak ion current amplitudes ( $I_{peak}$ ); C, J: mid-plateau ion current magnitudes ( $I_{P50\%}$ ); D, K: current integrals (Q); E, L: peak ion current densities ( $J_{peak}$ ); F, M: mid-plateau ion current densities ( $J_{P50\%}$ ); G, N: current integrals divided with membrane capacitance (Q/C).

## References

- [1] B. Hegyi, B. Horvath, K. Vaczi, M. Gonczi, K. Kistamas, F. Ruzsnavszky, R. Veress, L.T. Izu, Y. Chen-Izu, T. Banyasz, J. Magyar, L. Csernoch, P.P. Nanasi, N. Szentandrassy, Ca<sup>2+</sup>-activated Cl<sup>-</sup> current is antiarrhythmic by reducing both spatial and temporal heterogeneity of cardiac repolarization, *Journal of molecular and cellular cardiology* 109 (2017) 27-37.
- [2] B. Horvath, K. Vaczi, B. Hegyi, M. Gonczi, B. Dienes, K. Kistamas, T. Banyasz, J. Magyar, I. Baczko, A. Varro, G. Seprenyi, L. Csernoch, P.P. Nanasi, N. Szentandrassy, Sarcolemmal Ca<sup>2+</sup>-entry through L-type Ca<sup>2+</sup> channels controls the profile of Ca<sup>2+</sup>-activated Cl<sup>-</sup> current in canine ventricular myocytes, *Journal of molecular and cellular cardiology* 97 (2016) 125-39.
- [3] G. Szabo, N. Szentandrassy, T. Biro, B.I. Toth, G. Czifra, J. Magyar, T. Banyasz, A. Varro, L. Kovacs, P.P. Nanasi, Asymmetrical distribution of ion channels in canine and human left-ventricular wall: epicardium versus midmyocardium, *Pflugers Archiv : European journal of physiology* 450(5) (2005) 307-16.
- [4] U. Knief, W. Forstmeier, Violating the normality assumption may be the lesser of two evils, *Behavior Research Methods* 53(6) (2021) 2576-2590.
- [5] S. Edgell, S. Noon, Effect of violation of normality on the t test of the correlation coefficient, *Psychological Bulletin* 95 (1984) 576-583.
- [6] L.L. Havlicek, N.L. Peterson, Robustness of the Pearson Correlation against Violations of Assumptions, *Perceptual and Motor Skills* 43(3\_suppl) (1976) 1319-1334.

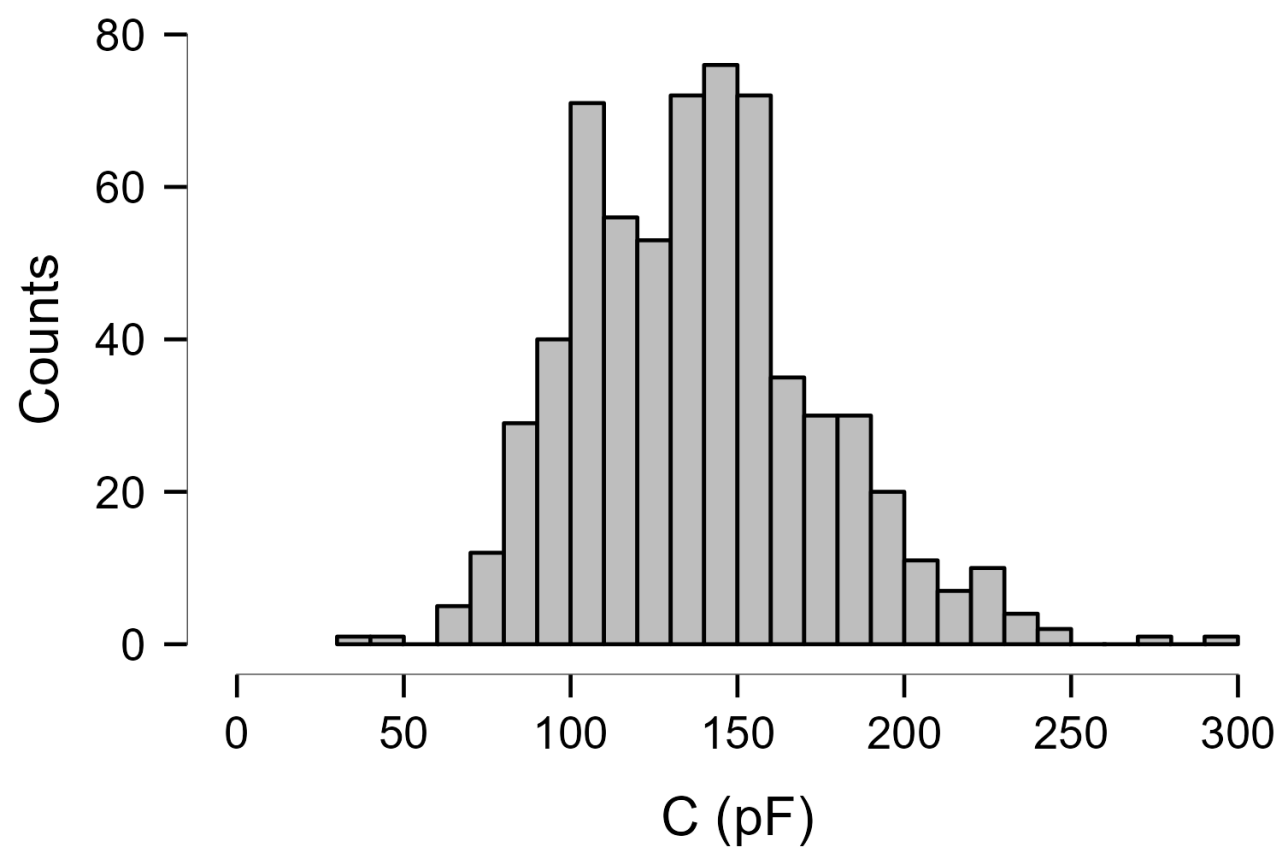

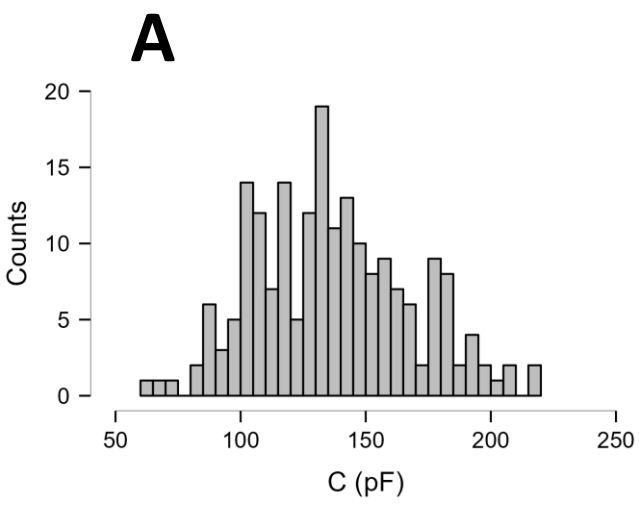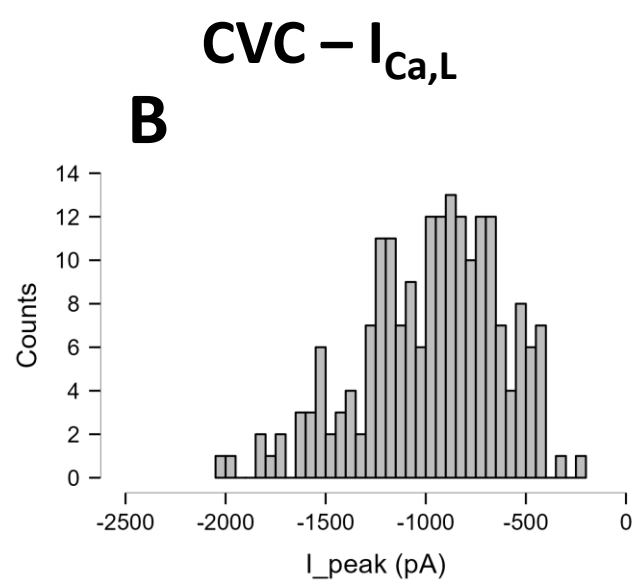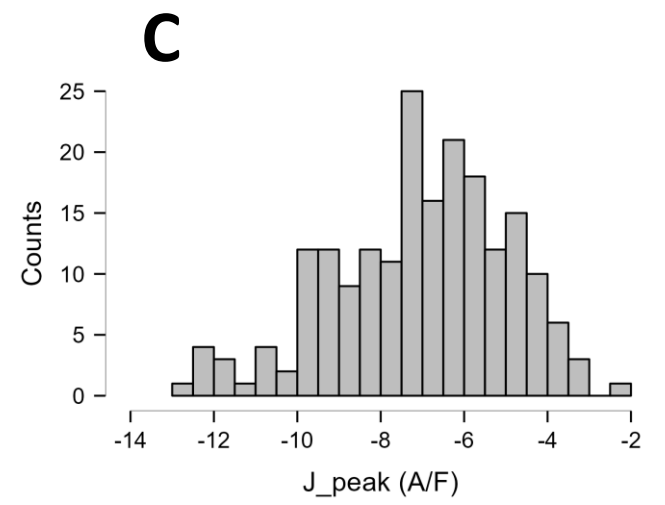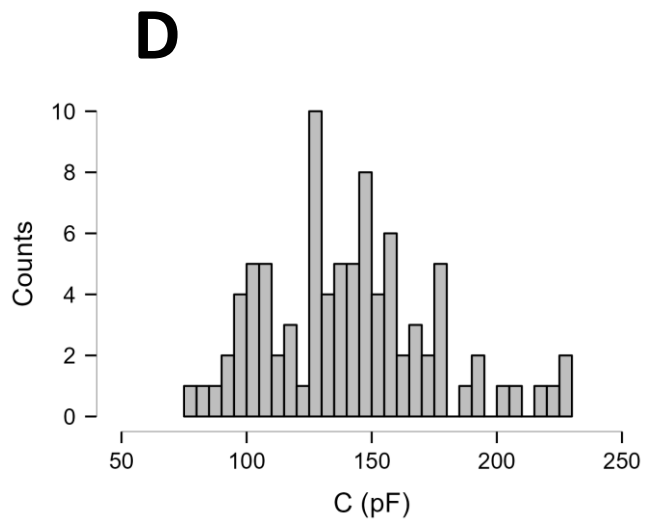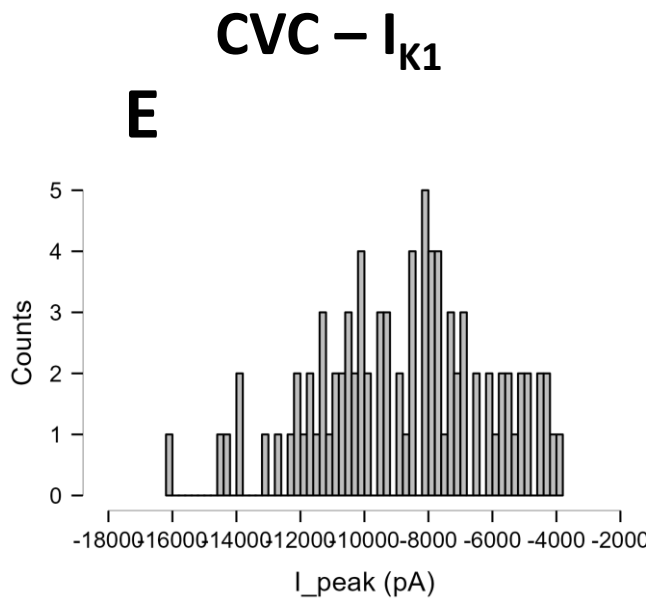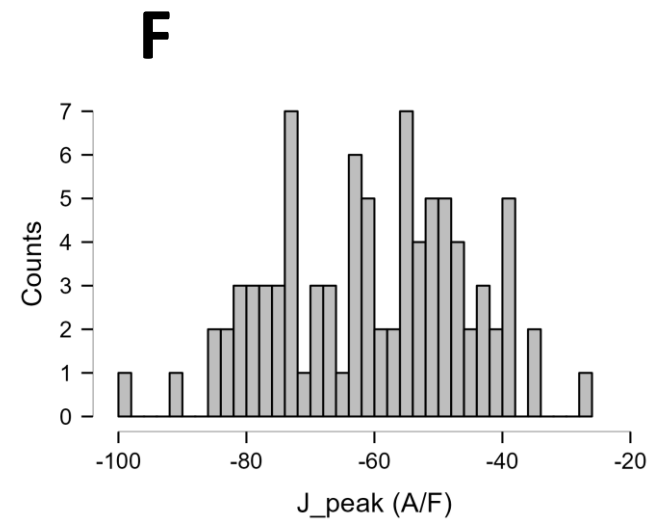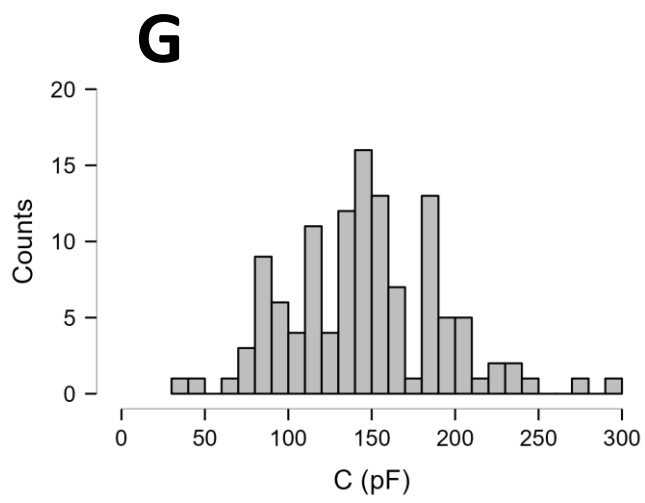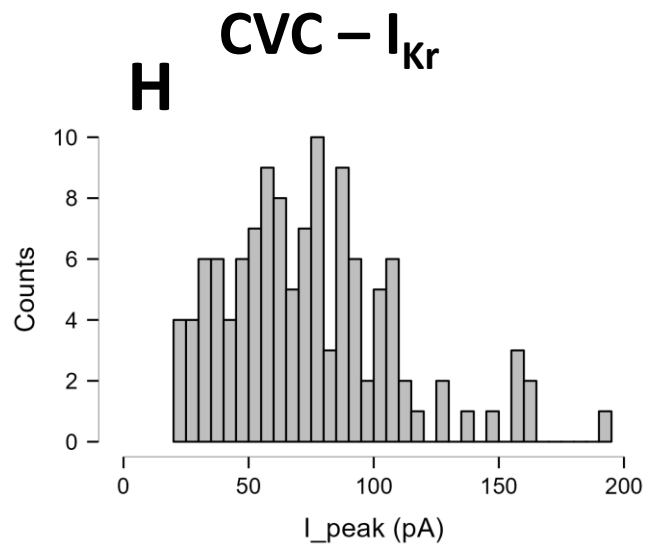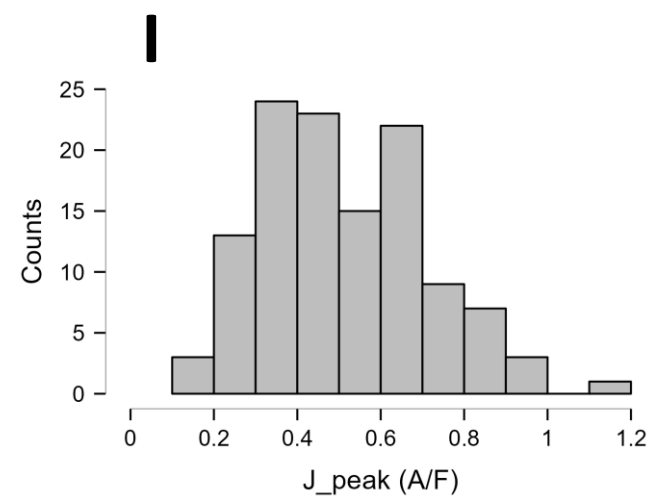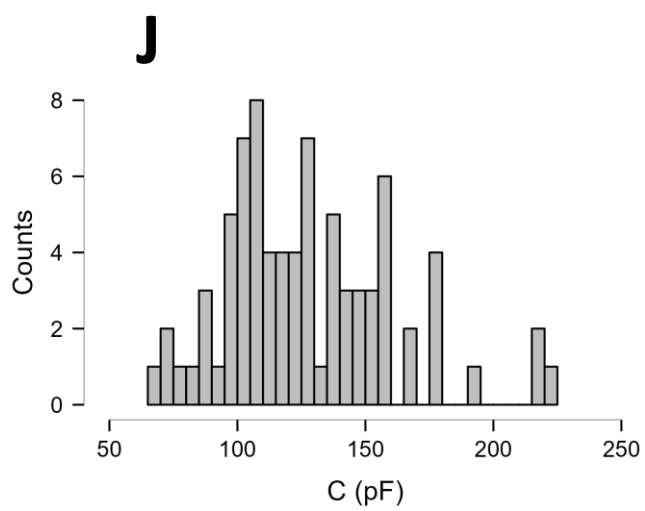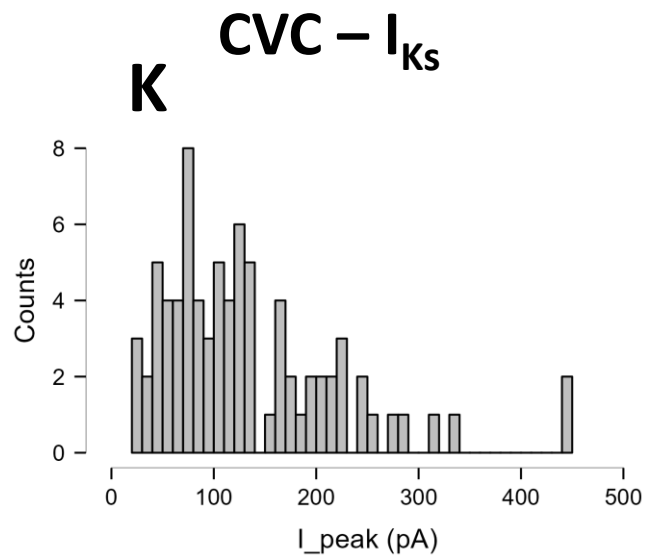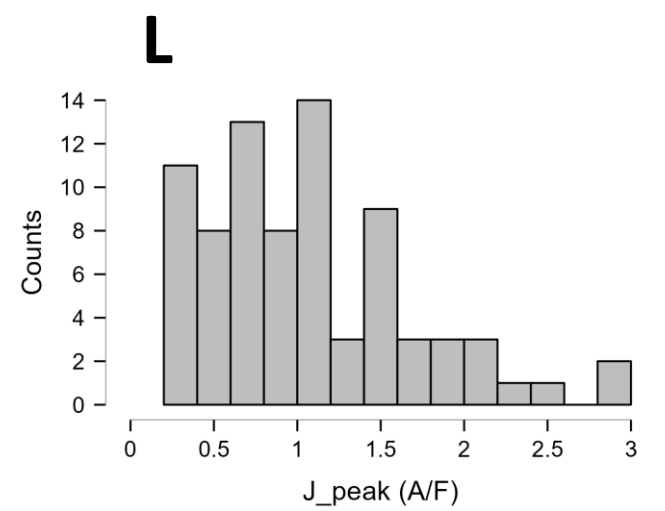

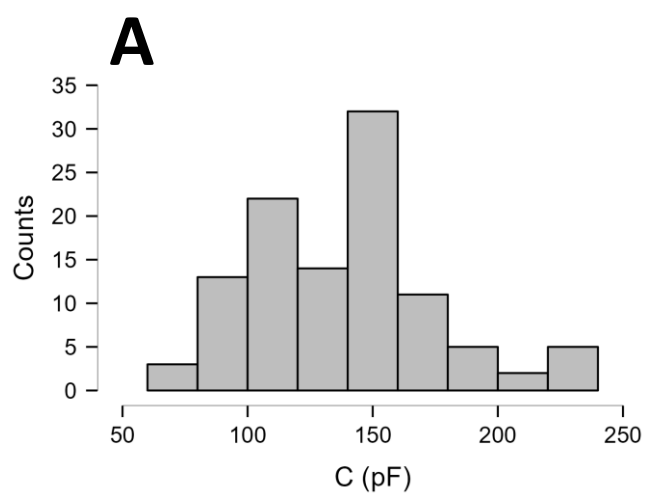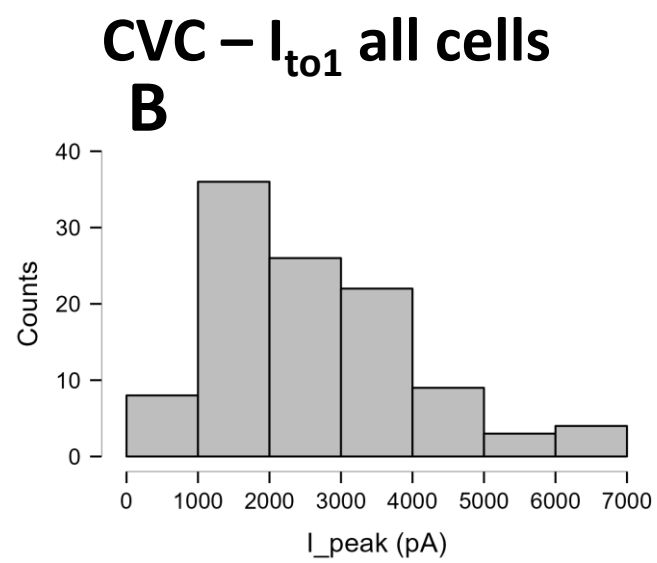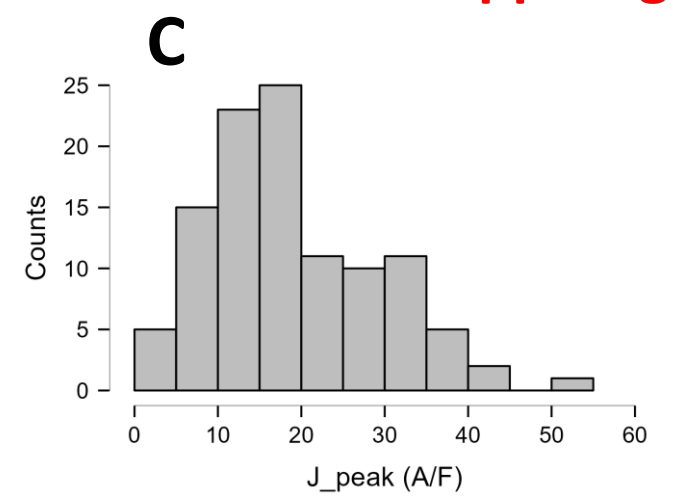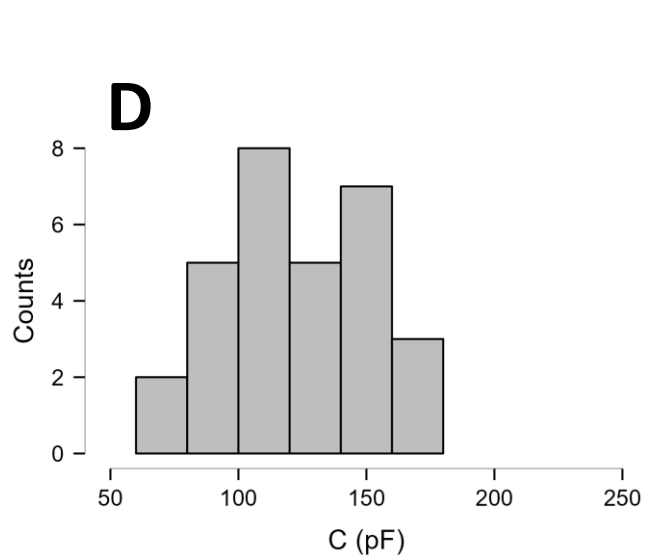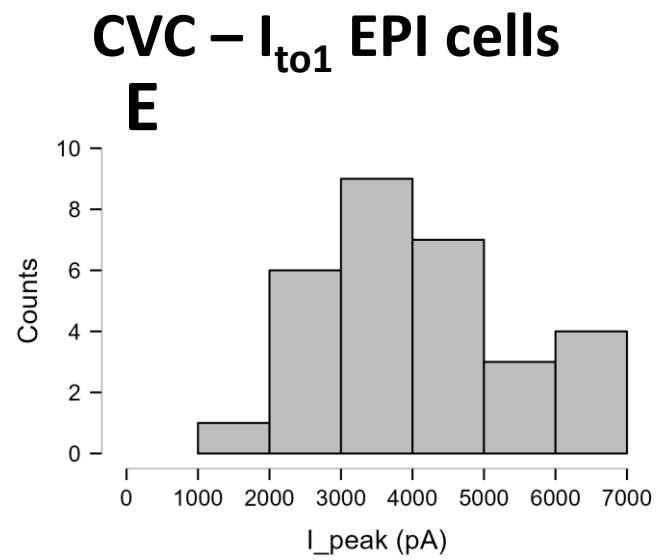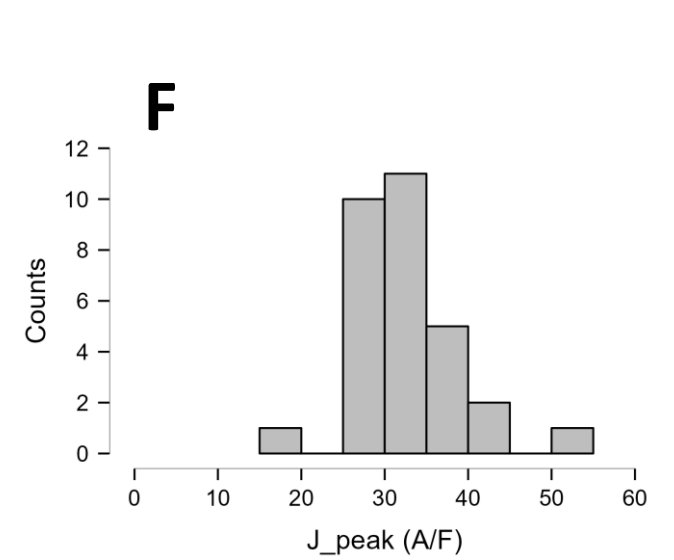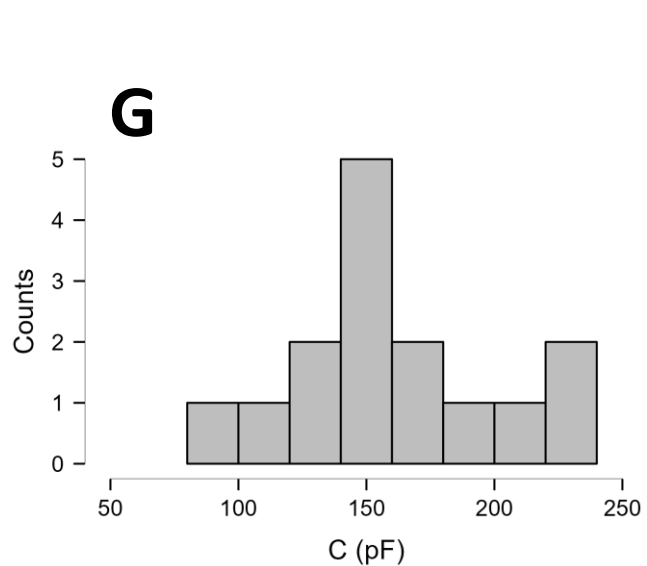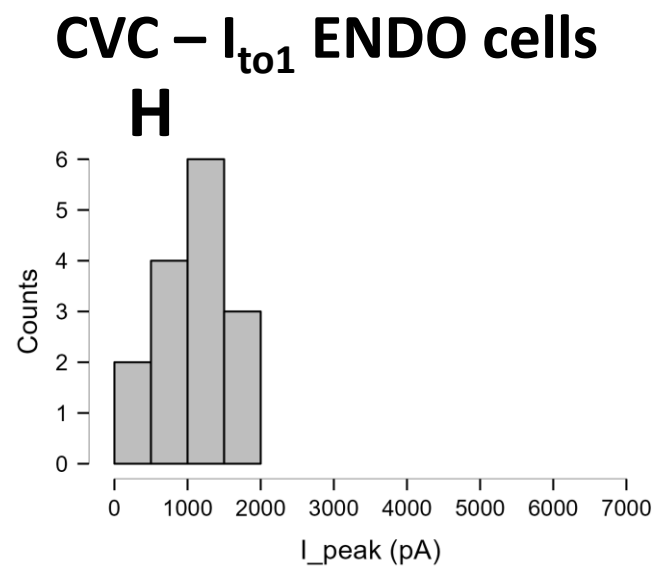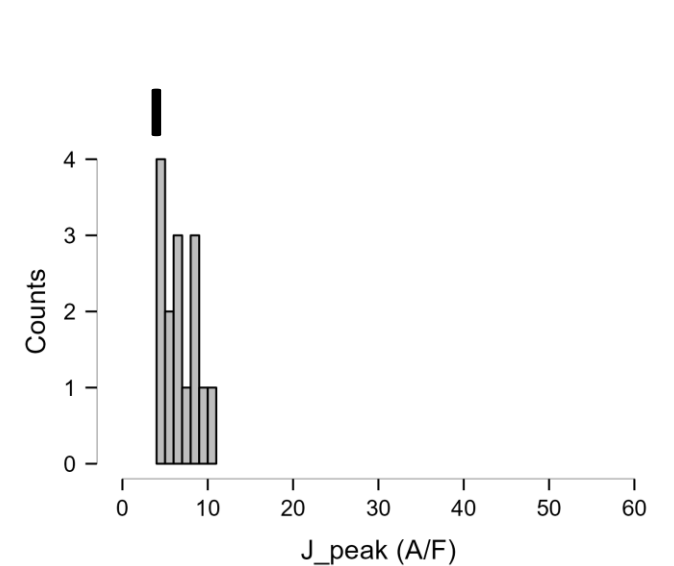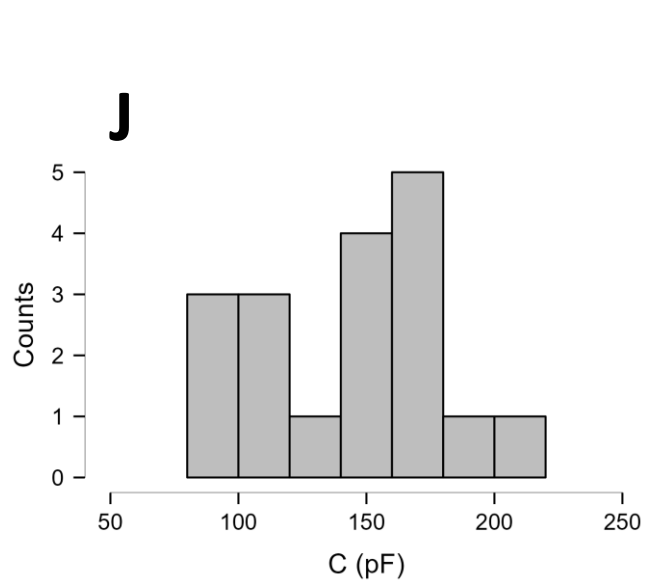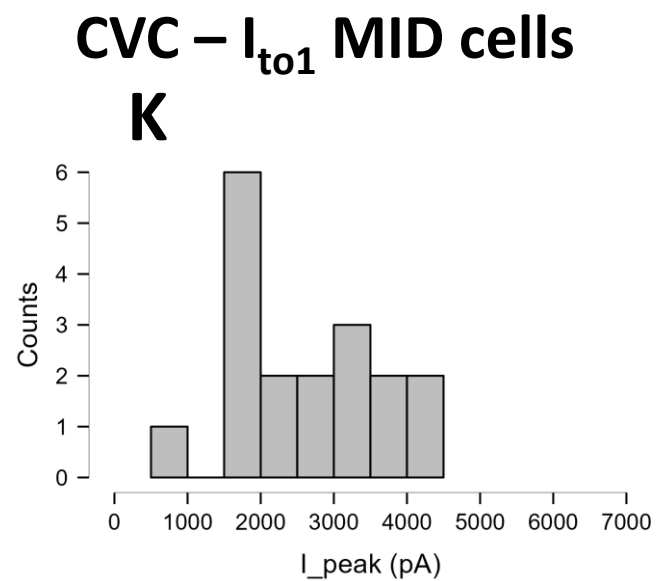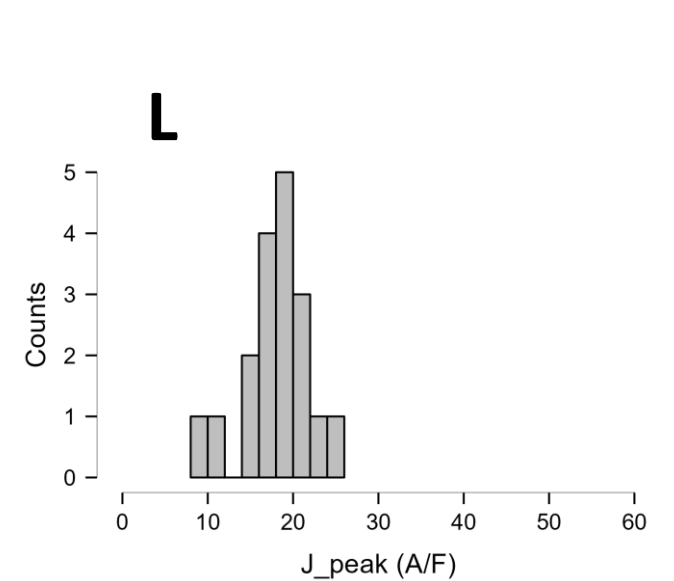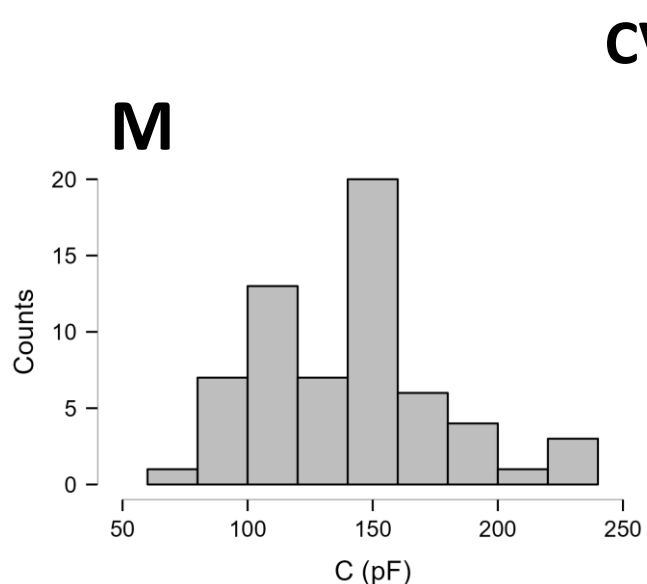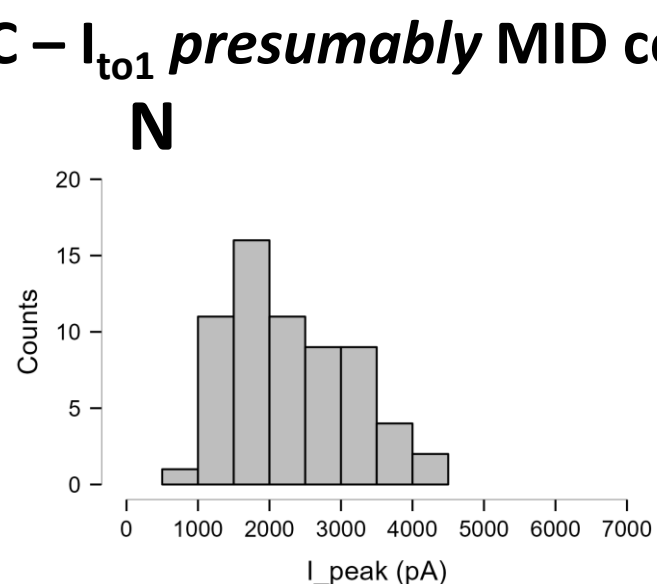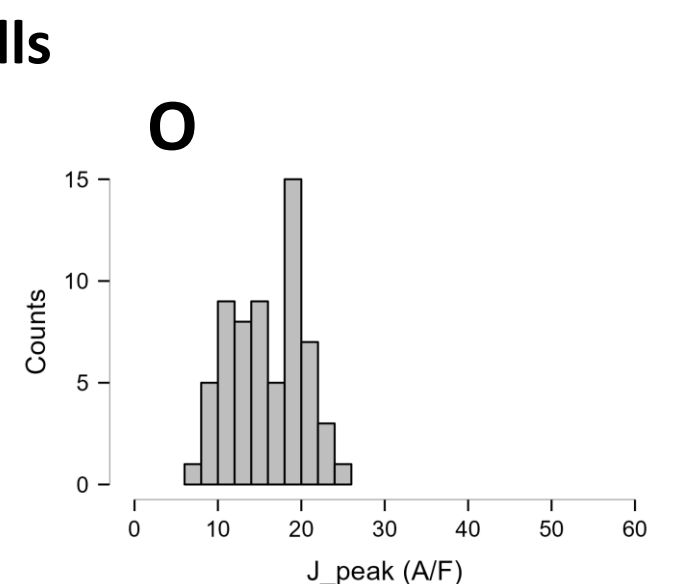

APVC –  $I_{Na,late}$

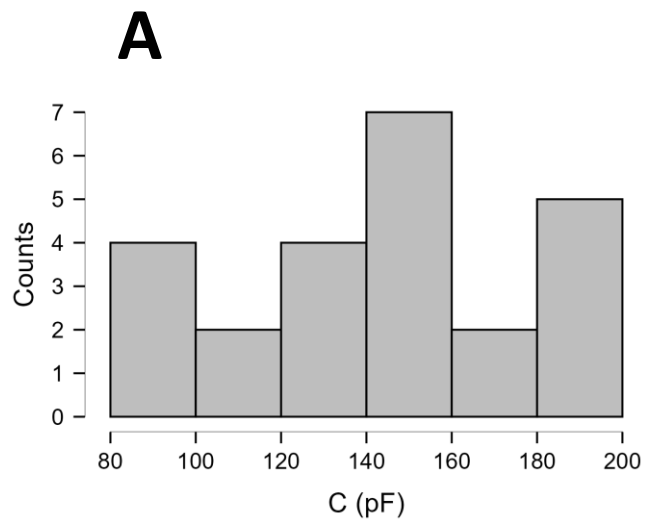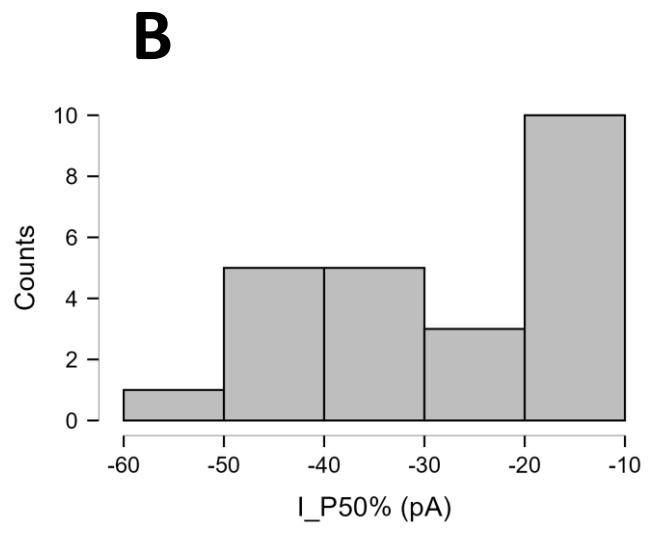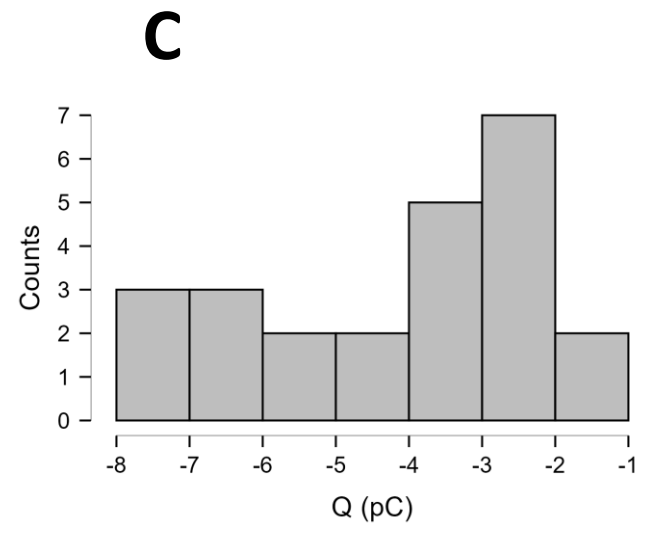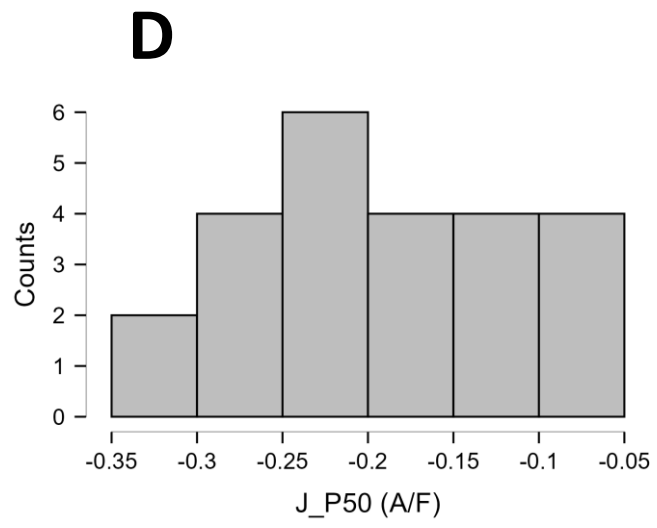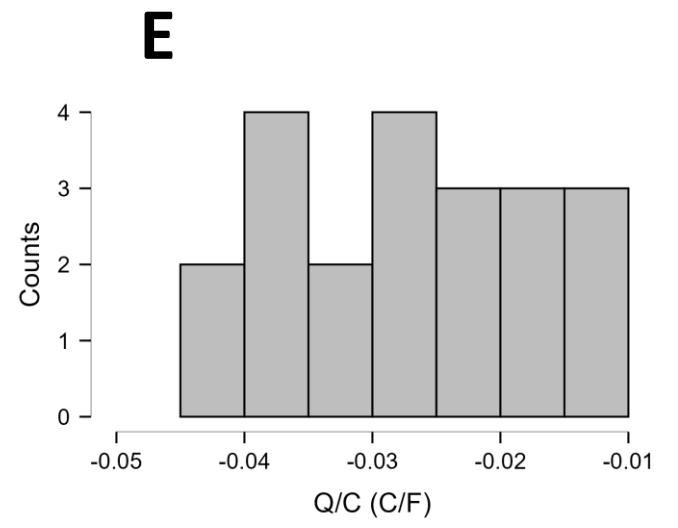

APVC –  $I_{NCX}$

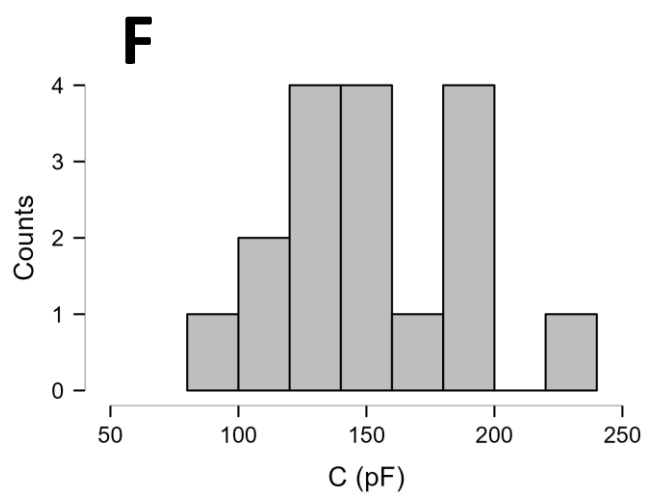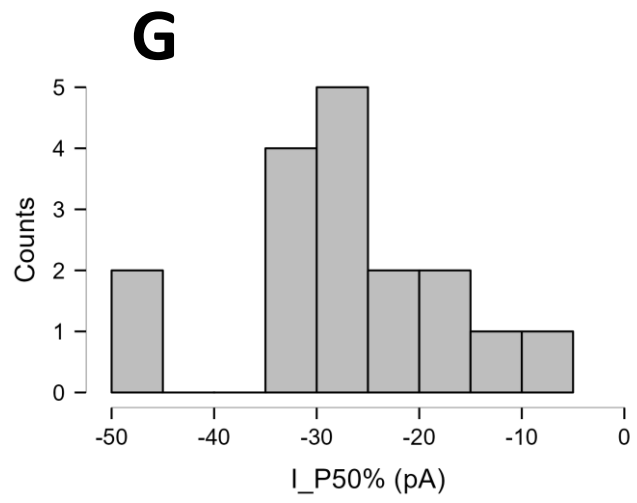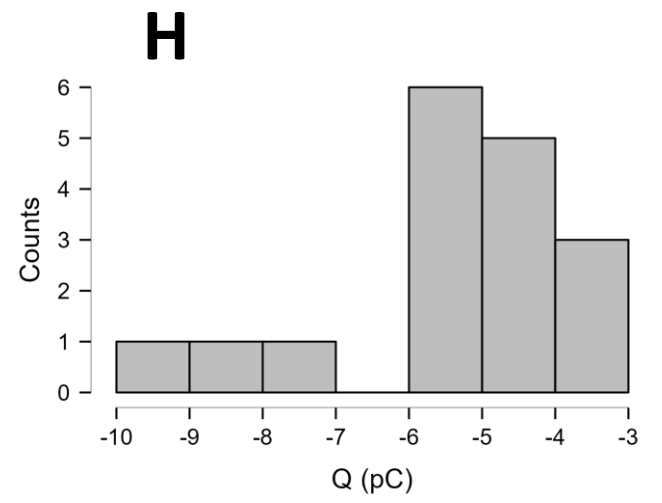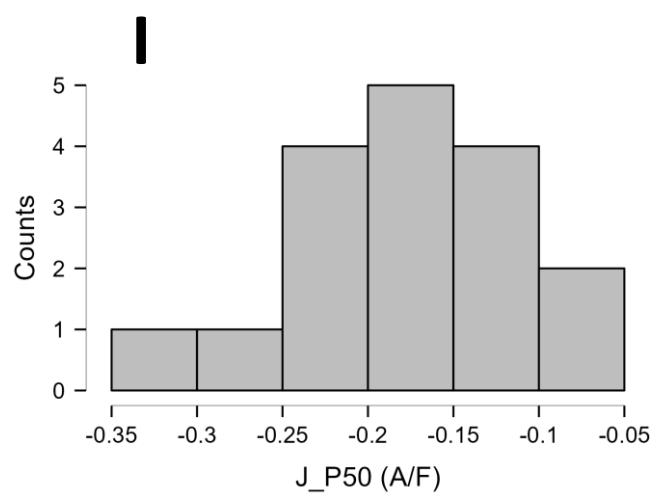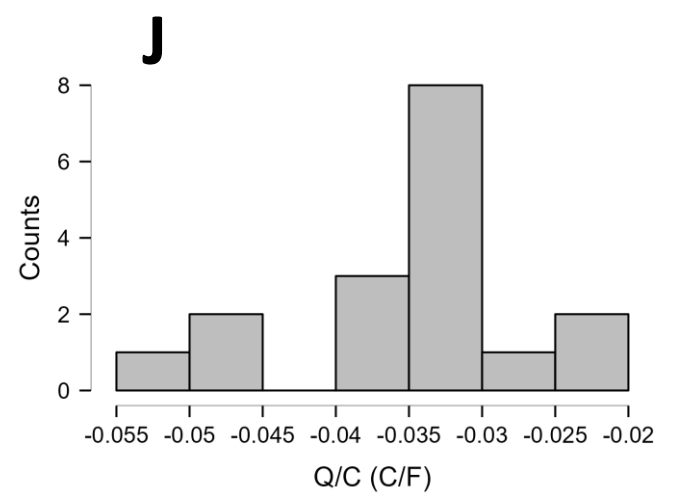

APVC –  $I_{Ca,L}$

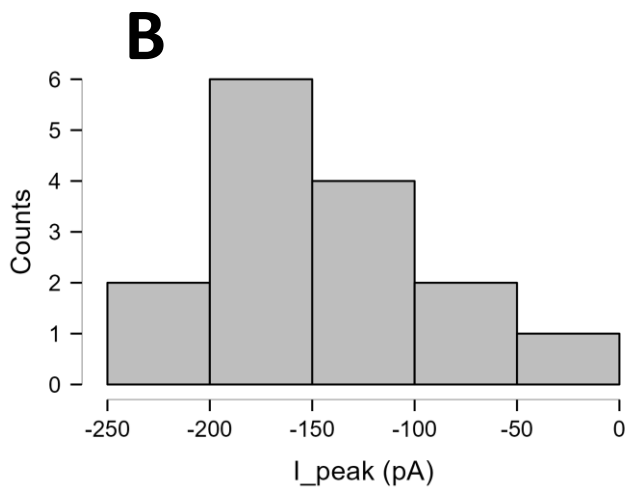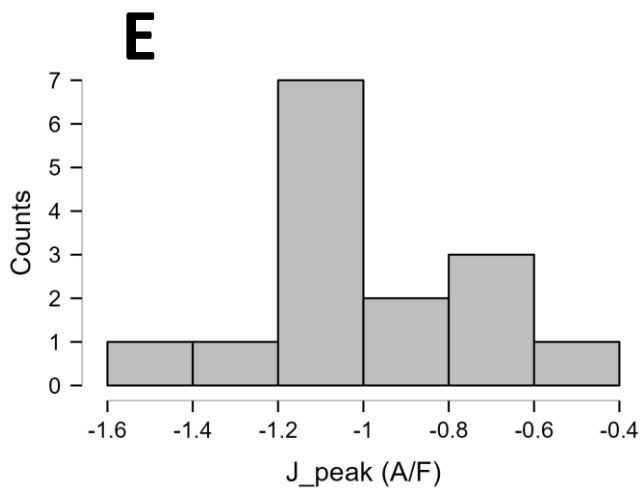

APVC –  $I_{K1}$

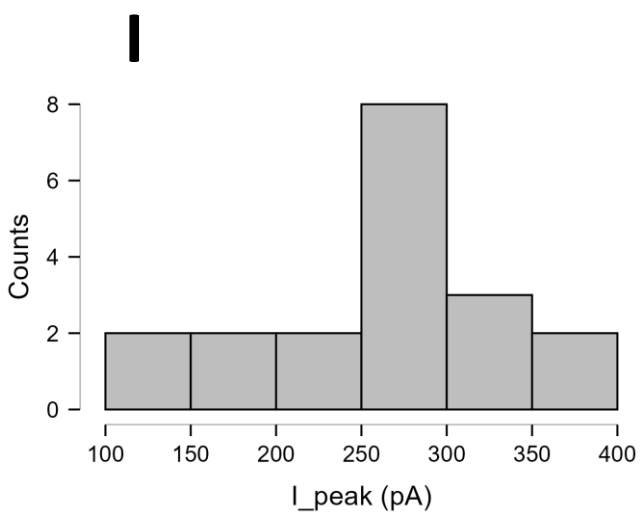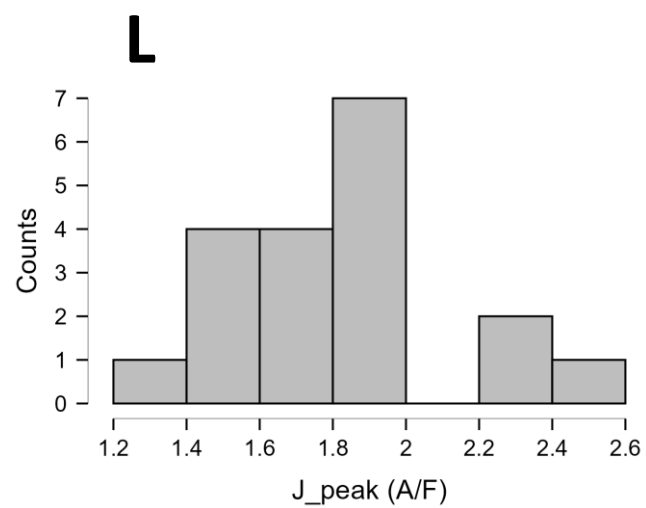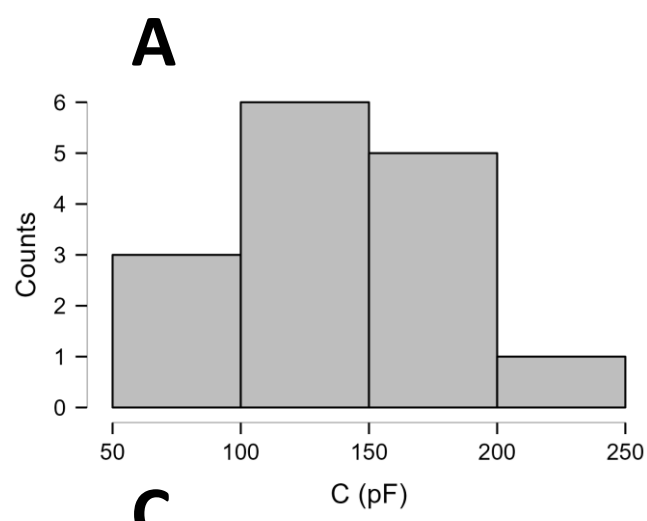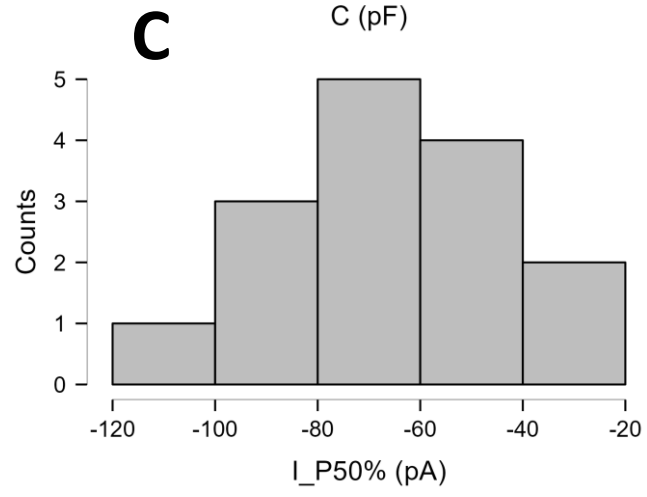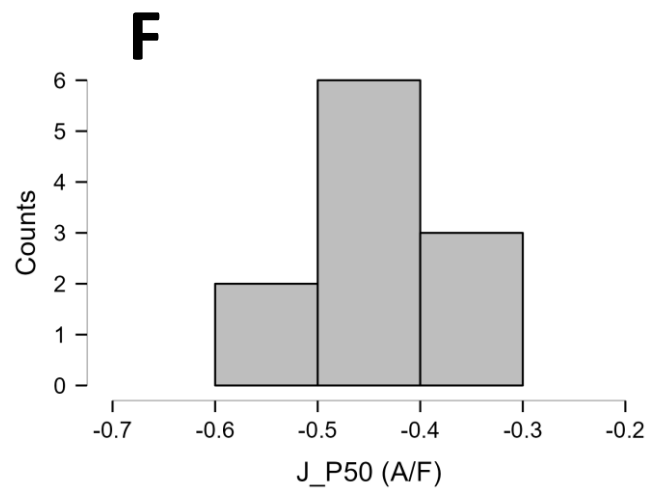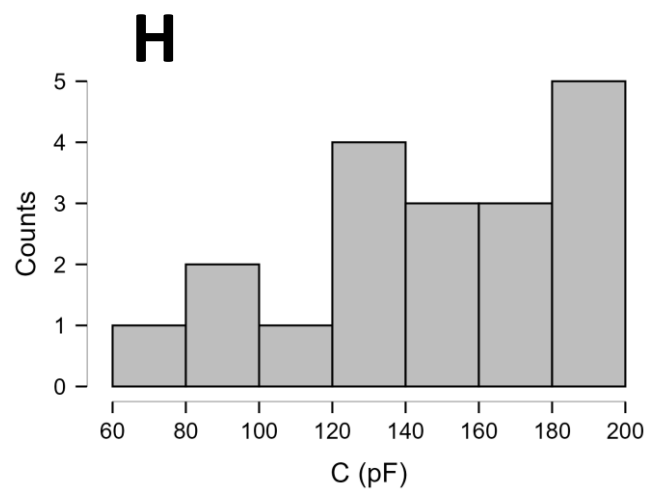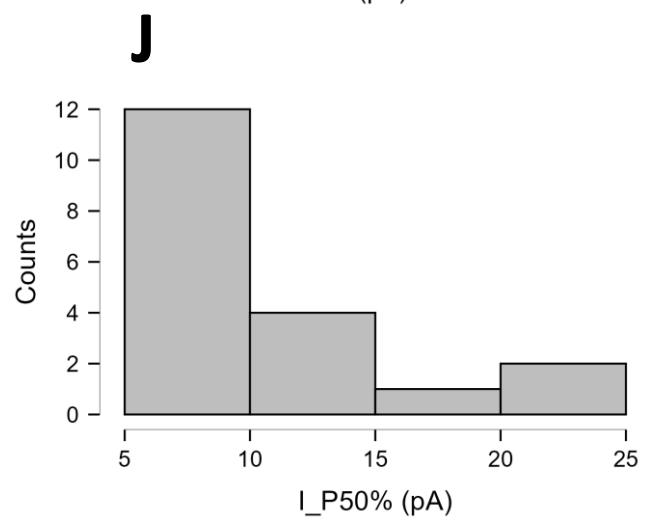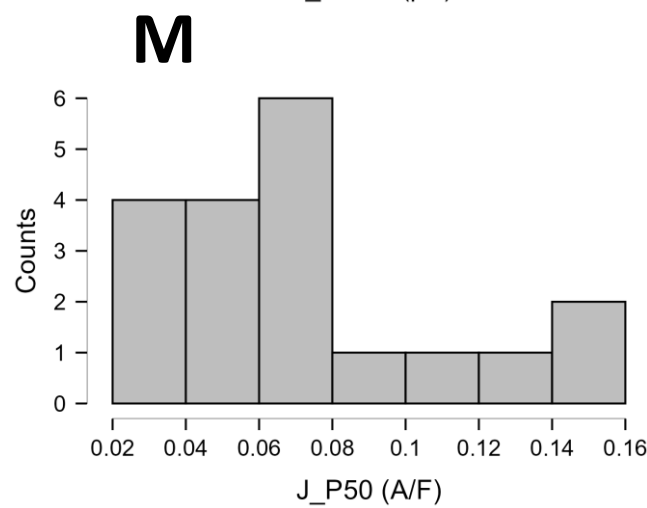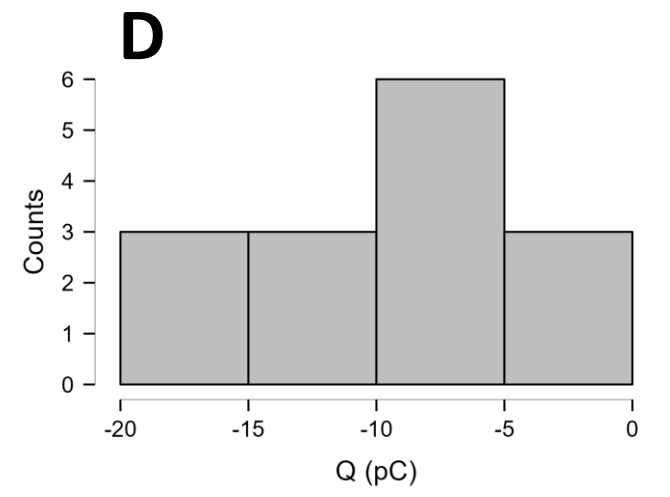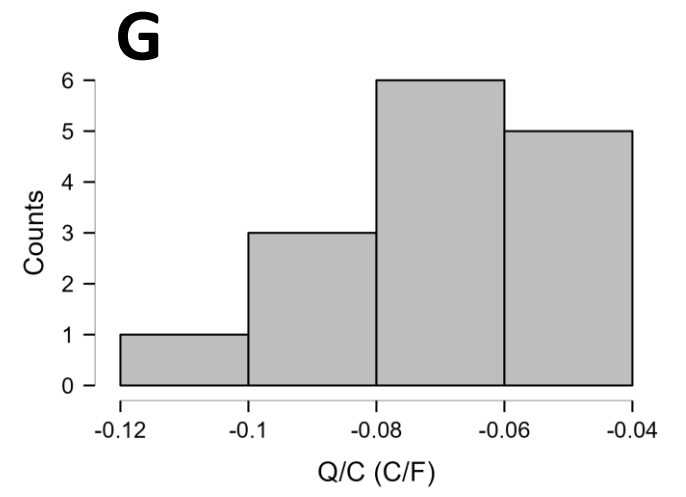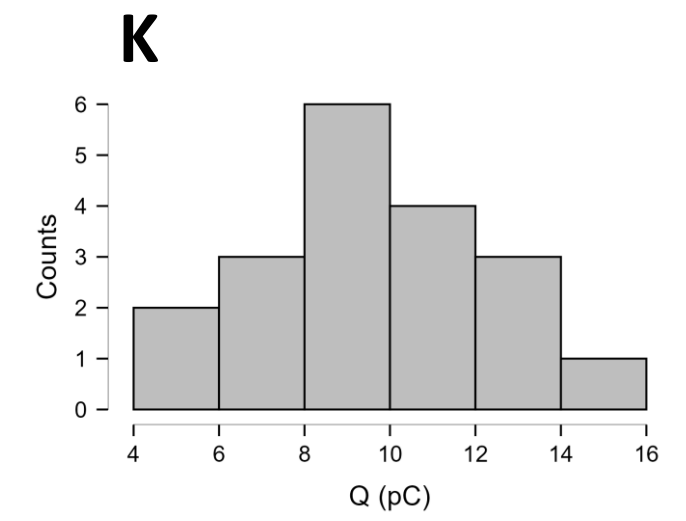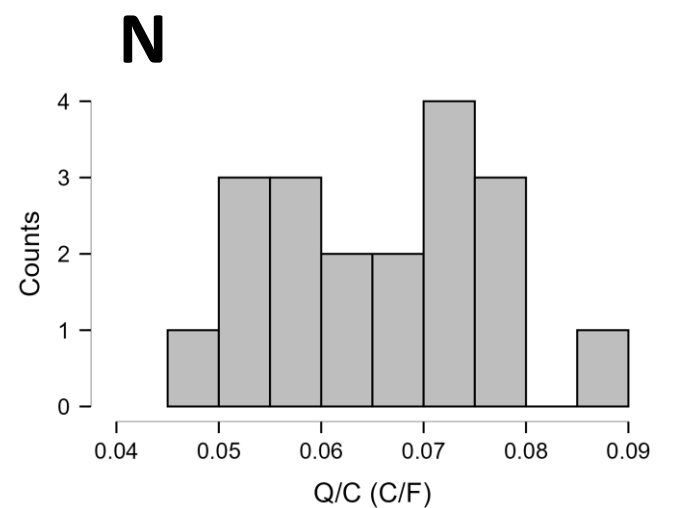

APVC –  $I_{Kr}$

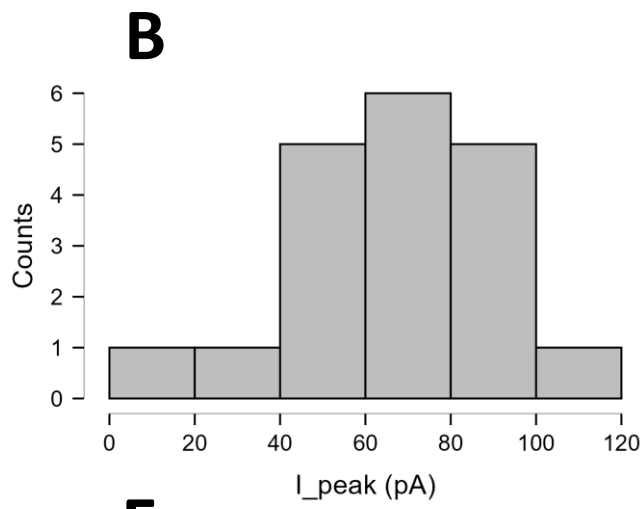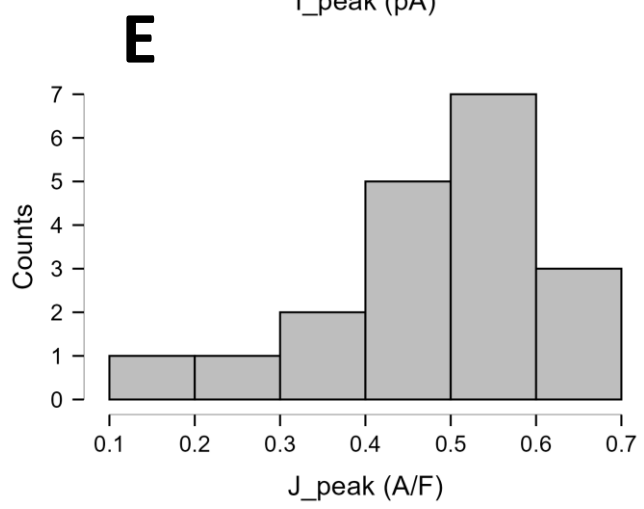

APVC –  $I_{Ks}$

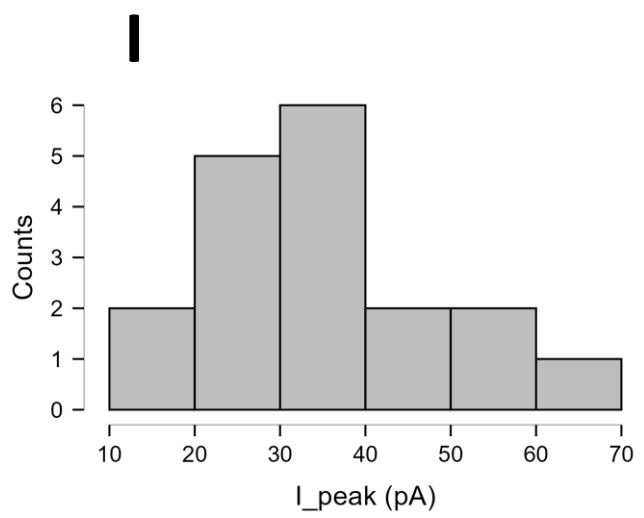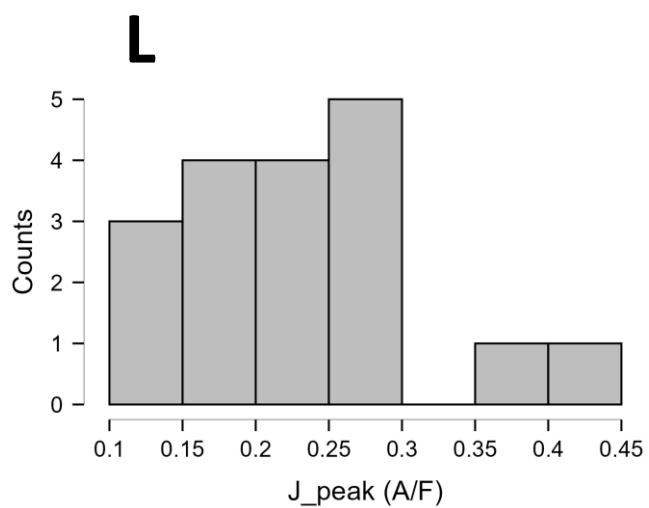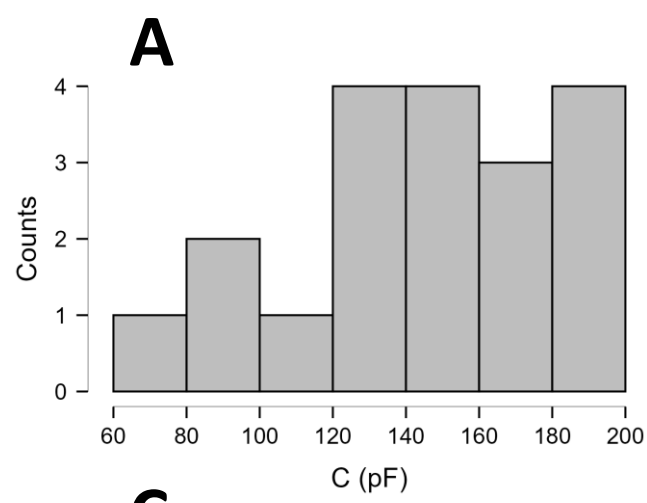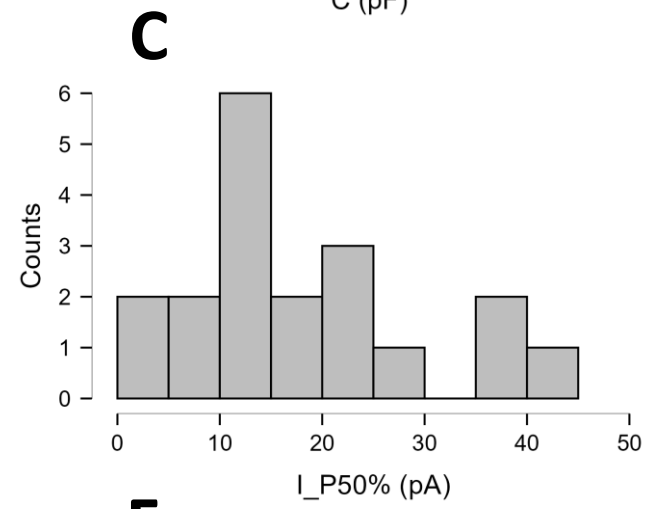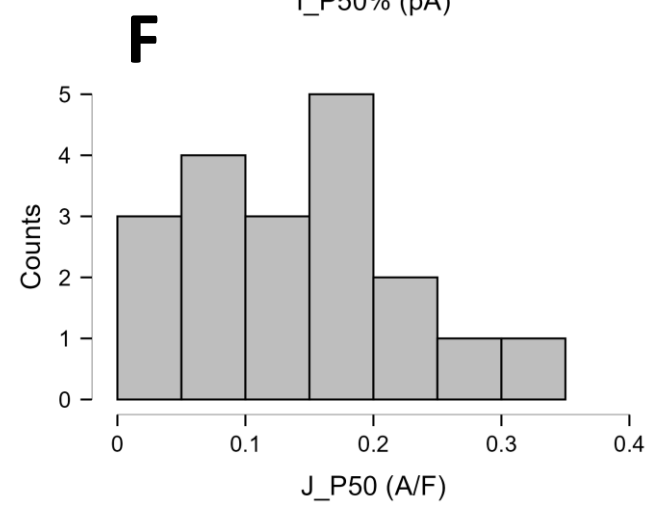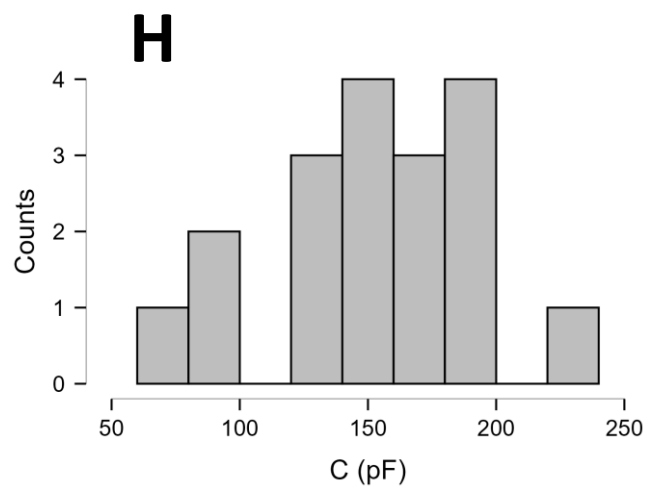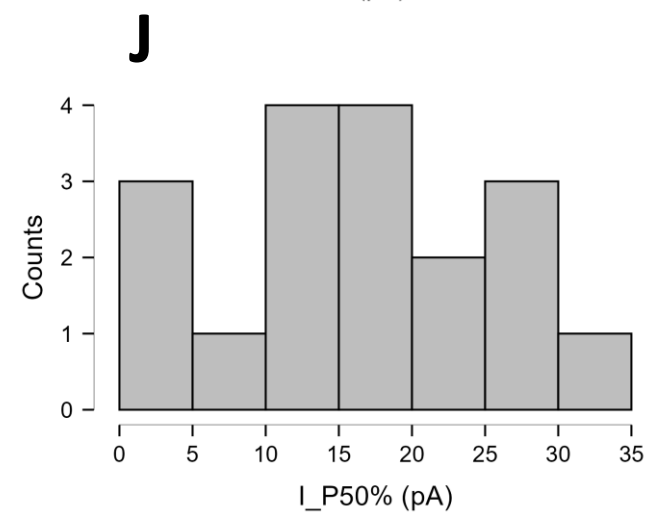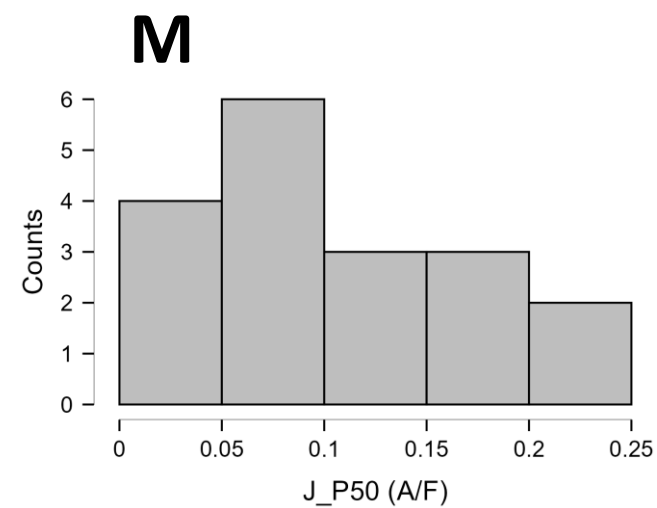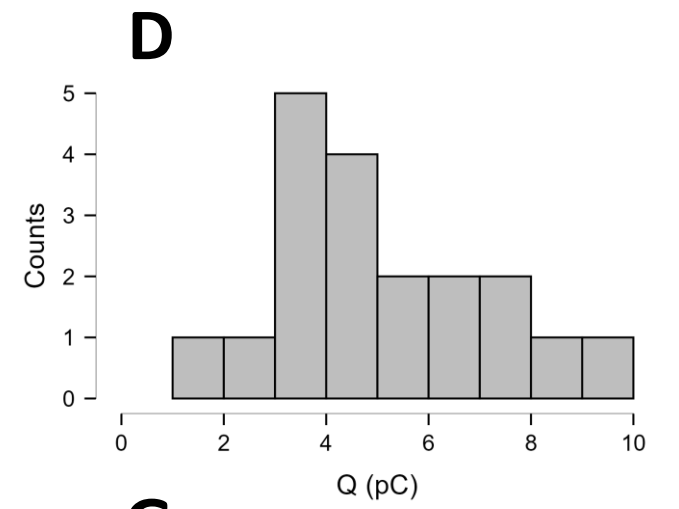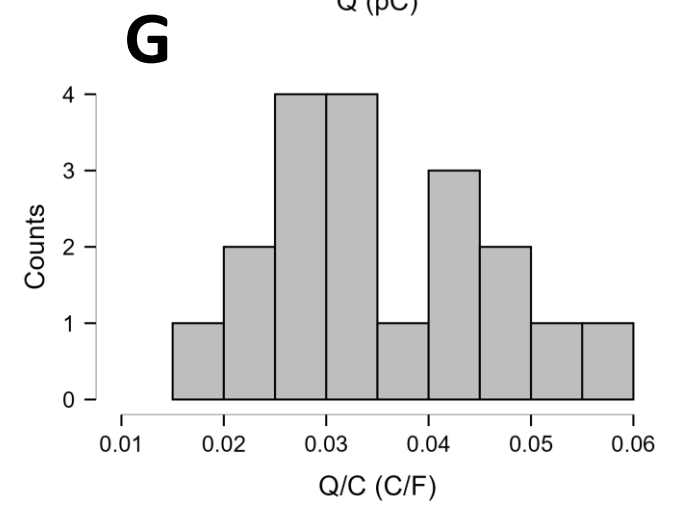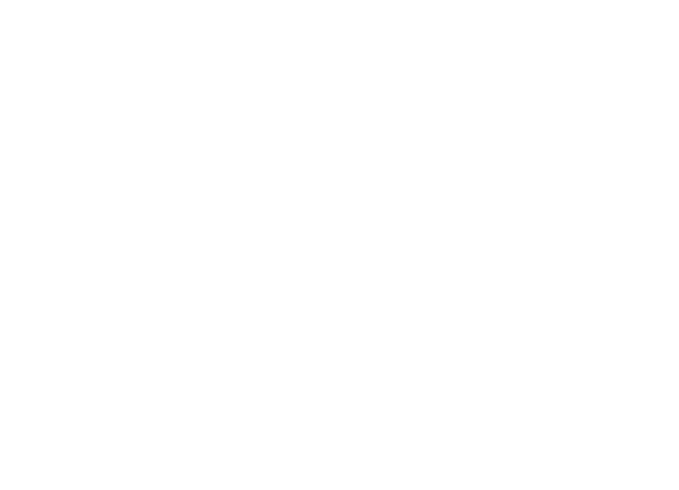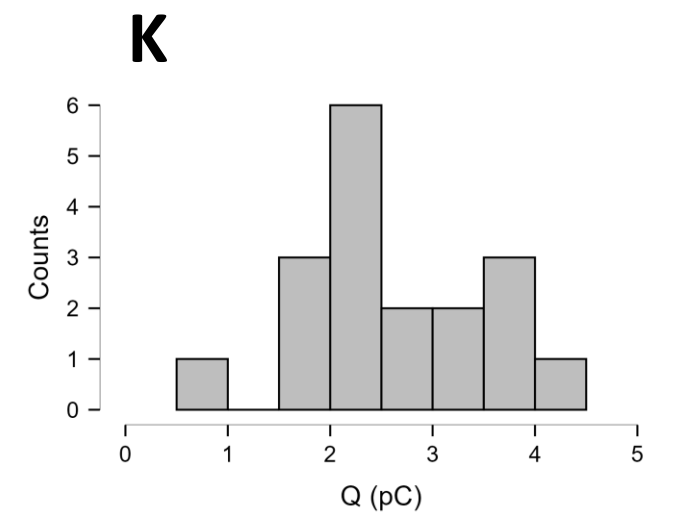

Supplement: Supplementary file 1 [file 7b30c24cae3e7b67dea7c13b.pdf]
